# Supplementary material for: Aggregation patterns of curcumin and piperine mixtures in different polar media
Source: Royal Society of Chemistry journal article supplement (doi:10.1039/d3cp00096f), 2023-01-01
Supplement: d3cp00096f3.pdf [file d3cp00096f3.pdf]

## Supporting Information

# Aggregation patterns of curcumin and piperine mixtures in different polar media

J.R.C. Santos, P.E. Abreu, and J.M.C. Marques\*

*CQC-IMS, Department of Chemistry, University of Coimbra, 3004-535 Coimbra, Portugal*

E-mail: qtmarque@ci.uc.pt

## Simulation box and atomic charges

**Table S1: Composition and box side of each system employed in the MD simulations using pure ethanol and water as solvents.**

| # CEK molecules     | # H <sub>2</sub> O molecules | # Ethanol molecules | box side (nm) |
|---------------------|------------------------------|---------------------|---------------|
| 1                   | 9560                         | 2886                | 6.60385       |
| 2                   | 18995                        | 5784                | 8.32034       |
| 4                   | 38264                        | -                   | 10.48297      |
| # CKK molecules     |                              |                     |               |
| 1                   | 9563                         | 2887                | 6.60385       |
| 2                   | 19000                        | 5778                | 8.32034       |
| 4                   | 38267                        | -                   | 10.48297      |
| # PIP molecules     |                              |                     |               |
| 1                   | 9564                         | 2885                | 6.60385       |
| 2                   | 19000                        | 5786                | 8.32034       |
| 4                   | 38282                        | -                   | 10.48297      |
| # CEK:PIP molecules |                              |                     |               |
| 1:1                 | 18997                        | 5778                | 8.32034       |
| 2:2                 | 38273                        | 11743               | 10.48297      |
| # CKK:PIP molecules |                              |                     |               |
| 1:1                 | 18995                        | 5784                | 8.32034       |
| 2:2                 | 38277                        | 11740               | 10.48297      |

**Table S2: Composition and box side of each system employed in the MD simulations using ethanol:water (30:70) mixture as solvent.**

| # CEK molecules     | # H <sub>2</sub> O molecules | # Ethanol molecules | box side (nm) |
|---------------------|------------------------------|---------------------|---------------|
| 1                   | 6273                         | 1030                | 6.60385       |
| 2                   | 12561                        | 2068                | 8.32034       |
| 4                   | 25622                        | 4127                | 10.48297      |
| <hr/>               |                              |                     |               |
| # CKK molecules     |                              |                     |               |
| 1                   | 6273                         | 1029                | 6.60385       |
| 2                   | 12557                        | 2066                | 8.32034       |
| 4                   | 25626                        | 4127                | 10.48297      |
| <hr/>               |                              |                     |               |
| # PIP molecules     |                              |                     |               |
| 1                   | 6274                         | 1029                | 6.60385       |
| 2                   | 12569                        | 2065                | 8.32034       |
| <hr/>               |                              |                     |               |
| # CEK:PIP molecules |                              |                     |               |
| 1:1                 | 12557                        | 2066                | 8.32034       |
| 2:2                 | 25615                        | 4134                | 10.48297      |
| <hr/>               |                              |                     |               |
| # CKK:PIP molecules |                              |                     |               |
| 1:1                 | 12563                        | 2067                | 8.32034       |
| 2:2                 | 25622                        | 4131                | 10.48297      |

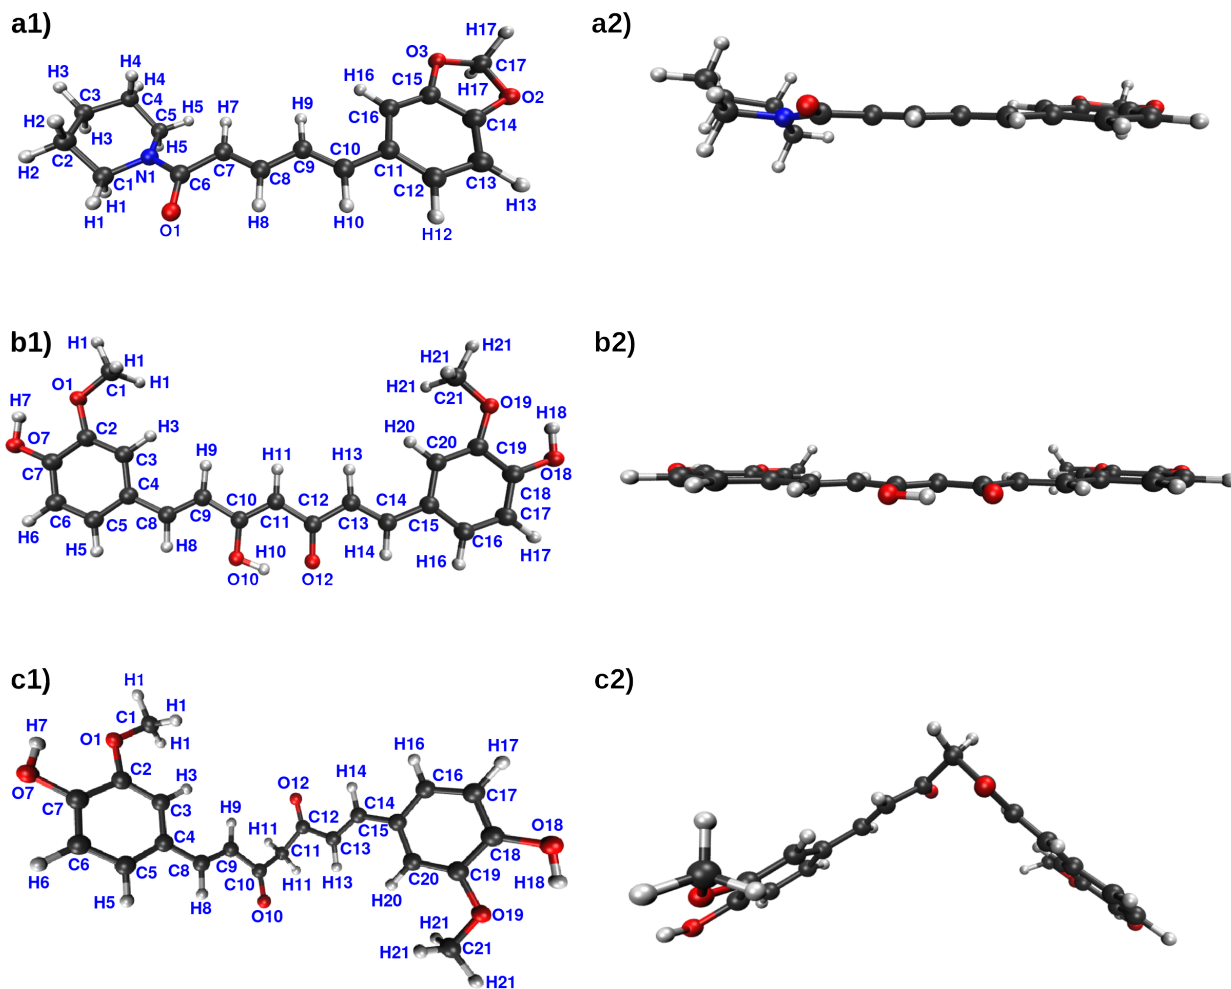

Figure S1: Molecular structures of the solute molecules from two different views: a1) PIP (front view); a2) PIP (side view); b1) CEK (front view); b2) CEK (side view); c1) CKK (front view); c2) CKK (side view). In the left views, the corresponding force-field label is shown for each atom of the molecule. Equivalent atoms have the same label.

**Table S3: Atomic charges of piperine (PIP) used in the MD simulations. Labels for the atoms are shown in Figure S1.**

| PIP  |         |      |         |      |        |
|------|---------|------|---------|------|--------|
| Atom | Charge  | Atom | Charge  | Atom | Charge |
| C1   | 0.0185  | C13  | -0.3372 | H4   | 0.0141 |
| C2   | -0.0130 | C14  | 0.3375  | H5   | 0.0383 |
| C3   | -0.0443 | C15  | 0.2193  | H7   | 0.1320 |
| C4   | 0.0085  | C16  | -0.2373 | H8   | 0.1318 |
| C5   | -0.0336 | C17  | 0.2377  | H9   | 0.1317 |
| C6   | 0.3689  | O1   | -0.4761 | H10  | 0.0981 |
| C7   | -0.2563 | O2   | -0.3499 | H12  | 0.1396 |
| C8   | -0.0443 | O3   | -0.3313 | H13  | 0.1851 |
| C9   | -0.1601 | N1   | -0.0828 | H16  | 0.1567 |
| C10  | -0.0547 | H1   | 0.0371  | H17  | 0.0757 |
| C11  | -0.0295 | H2   | 0.0216  | -    | -      |
| C12  | -0.1172 | H3   | 0.0143  | -    | -      |

**Table S4: Atomic charges of CEK and CKK used in the MD simulations. Labels for the atoms are shown in Figure S1. Only non-equivalent atoms are indicated.**

| CEK  |         |      |         | CKK  |         |      |         |
|------|---------|------|---------|------|---------|------|---------|
| Atom | Charge  | Atom | Charge  | Atom | Charge  | Atom | Charge  |
| C1   | -0.1112 | O7   | -0.4965 | C1   | -0.1030 | O1   | -0.2231 |
| C2   | 0.1220  | O10  | -0.5384 | C2   | 0.1084  | O7   | -0.5018 |
| C3   | -0.1467 | O12  | -0.5475 | C3   | -0.1599 | O10  | -0.4663 |
| C4   | -0.0505 | O18  | -0.4981 | C4   | -0.0139 | O12  | -0.4662 |
| C5   | -0.1847 | O19  | -0.2158 | C5   | -0.1835 | O18  | -0.4918 |
| C6   | -0.2079 | H1   | 0.0949  | C6   | -0.2149 | O19  | -0.2288 |
| C7   | 0.2223  | H3   | 0.1257  | C7   | 0.2469  | H1   | 0.0949  |
| C8   | 0.0013  | H5   | 0.1577  | C8   | -0.0417 | H3   | 0.1492  |
| C9   | -0.3515 | H6   | 0.1747  | C9   | -0.2665 | H5   | 0.1530  |
| C10  | 0.4862  | H7   | 0.3874  | C10  | 0.4101  | H6   | 0.1724  |
| C11  | -0.5785 | H8   | 0.1315  | C11  | -0.0696 | H7   | 0.3883  |
| C12  | 0.5870  | H9   | 0.1756  | C12  | 0.4095  | H8   | 0.1335  |
| C13  | -0.3793 | H10  | 0.4434  | C13  | -0.2861 | H9   | 0.1245  |
| C14  | 0.0133  | H11  | 0.1609  | C14  | -0.0450 | H10  | 0.0391  |
| C15  | -0.0446 | H13  | 0.1643  | C15  | -0.0094 | H11  | 0.1430  |
| C16  | -0.1861 | H14  | 0.1183  | C16  | -0.1690 | H13  | 0.1368  |
| C17  | -0.2243 | H16  | 0.1608  | C17  | -0.2237 | H14  | 0.1476  |
| C18  | 0.2424  | H17  | 0.1773  | C18  | 0.2282  | H16  | 0.1768  |
| C19  | 0.1067  | H18  | 0.3829  | C19  | 0.1307  | H17  | 0.3849  |
| C20  | -0.1442 | H20  | 0.1304  | C20  | -0.1643 | H18  | 0.1358  |
| C21  | -0.1006 | H21  | 0.0908  | C21  | -0.0897 | H20  | 0.0919  |
| O1   | -0.2228 | -    | -       | -    | -       | -    | -       |

## Mixed solvent box

To build a simulation box containing ethanol and water 30 % (m/m) at 25°C, we adopted the following procedure (this was also used previously to build acetonitrile and water boxes in Ref. 1 by two of the authors, but it was not described there). The density of the mixture was obtained from the Engineering Toolbox website<sup>2</sup> ( $\rho = 0.951 \text{ g cm}^{-3}$ ) and we chose to simulate a cubic box of 100 Å side. In this box we placed 3734 molecules of ethanol and 22271 molecules of TIP4P-2005 water using packmol.<sup>3</sup> The number of molecules was calculated to replicate the density and the concentration of the solution. The ethanol force field parameters were obtained from Refs. 4 and 5 where the authors created a 20 % (m/m) ethanol/water box for studies of solvent mapping of proteins, and were generated and converted from AMBER format to a format suitable to be used in GROMACS with acpype. After generating the initial configuration we used the conventional MD procedure: a minimization step, and two equilibration steps (an NVT ensemble followed by an NPT ensemble, each of duration of 500 ps) which allowed the system to reach the temperature of 298.15 K and pressure of 1 bar. The production stage of the MD simulation was run for 100 ns, and used an NVT ensemble. We used the same parameters as the ones used in the simulations of the main system described in the text. The last frame of the simulation was used as the solvation box used in subsequent simulations. The density of the production run is  $0.950 \text{ g cm}^{-3}$  with a root mean square deviation of  $1.66 \times 10^{-3} \text{ g cm}^{-3}$  in accord to the experimental value.

This box, the system coordinates and topology files can be downloaded from:

<https://github.com/peabreu/Mixed-Solvents/tree/main/ETA+WAT30>

## Atom-atom RDFs

Only the most relevant RDF plots are represented here; all the remaining ones are available in the "additionalmaterials" file at:

[https://github.com/comput-chem-uc/Curcumin\\_Piperine.git](https://github.com/comput-chem-uc/Curcumin_Piperine.git)

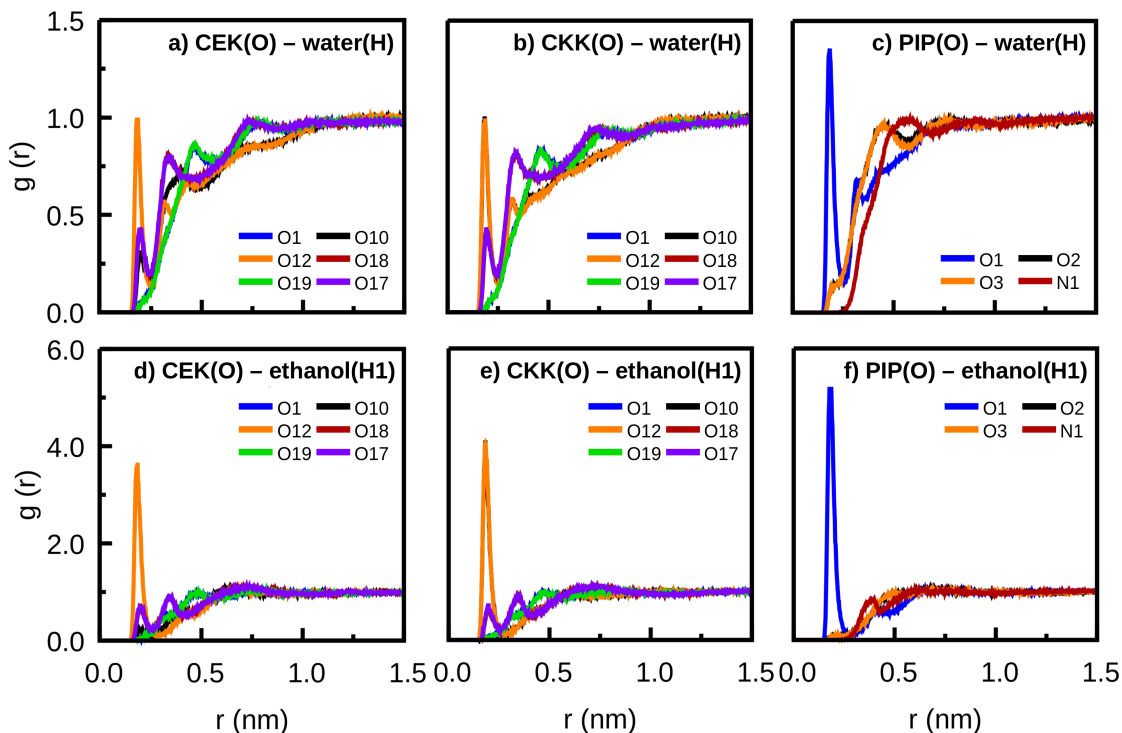

Figure S2: Solute-solvent atom-atom RDFs between one of the oxygens of the solute molecules and the hydrogen of water (a-c) or ethanol (d-f) for three simulations of distinct pairs of solute molecules in water (a-c) or ethanol (d-f): a) CEK-CEK; b) CKK-CKK; e) PIP-PIP. The represented oxygens are identified in Figure S1, the H1 of ethanol stands for the hydrogen of the -OH group of ethanol. Note that, in panels b and e, O10 line is not visible due to the overlap with the O12 line.

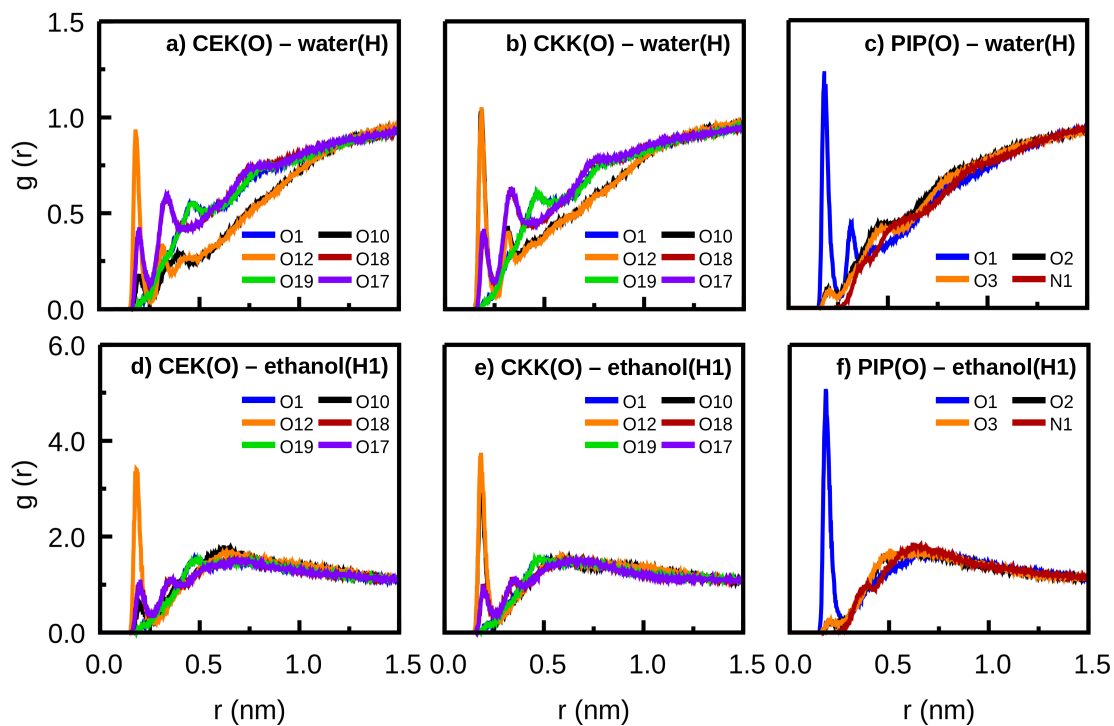

Figure S3: Solute-solvent atom-atom RDFs between one of the oxygens of the solute molecules and the hydrogen of water (a-c) or ethanol (d-f) for three simulations of distinct pairs of solute molecules in (30:70) solvent mixture: a) CEK-CEK; b) CKK-CKK; e) PIP-PIP. The represented oxygens are identified in Figure S1, the H1 of ethanol stands for the hydrogen of the -OH group of ethanol. Note that, in panels b and e, O10 line is not visible due to the overlap with the O12 line.



## **Movies of CEK-CEK and CKK-CKK dimers in ethanol**

Movies showing how both CEK-CEK and CKK-CKK dimers can be separated apart by the action of the ethanol; for clarity, the solvent molecules are not displayed in the movies. The corresponding trajectories begin with the dimers, which dissociate into the monomers after a few nanoseconds.

## Simulations with the (30:70) solvent mixture

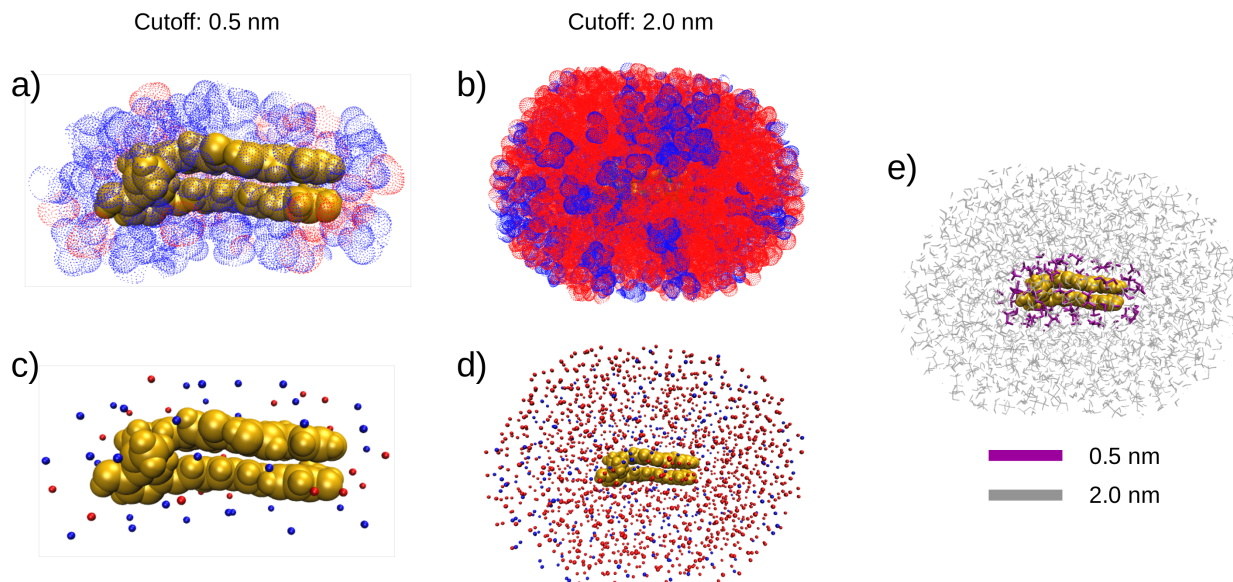

Figure S4: Typical trajectory-frame representing the solvation around the CEK dimer (yellow) in the solvent mixture of ethanol+water. A cutoff of 0.5 nm (a and c) and 2 nm (b and d) to the CEK surface for the solvent that is represented. Key for colors of a-d: blue for ethanol and red for water. Panel e) illustrates schematically how the two cutoffs employed in panels a and c (0.5 nm, with solvent molecules assigned in purple) and panels b and d (2 nm, with solvent molecules assigned in grey) are defined.

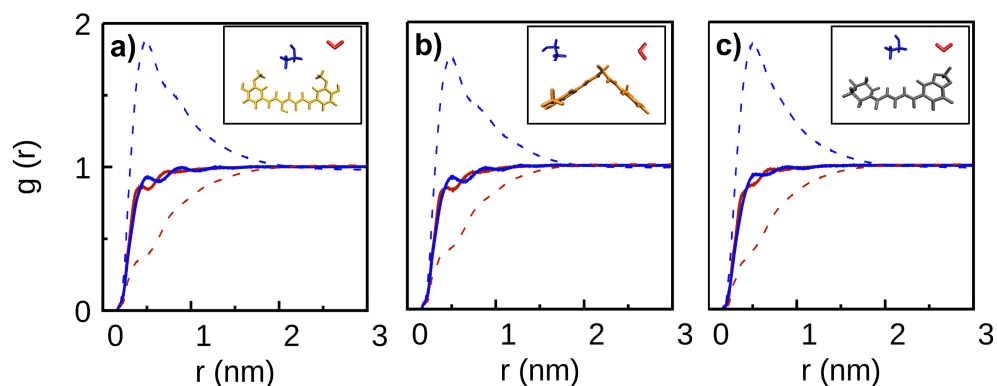

Figure S5: Solute-solvent RDFs for simulations with a single CEK (a), CKK (b) and PIP (c) molecules in a (30:70) solvent mixture. Center-of-mass RDFs related to water (ethanol) are represented by red (blue) lines; solid lines refer to simulations in pure solvents (water or ethanol), while dashed curves are for the (30:70) solvent mixture. The inserts represent the corresponding monomers, as well as one molecule of water (in red) and one molecule of ethanol (in blue).

## Energetic analysis

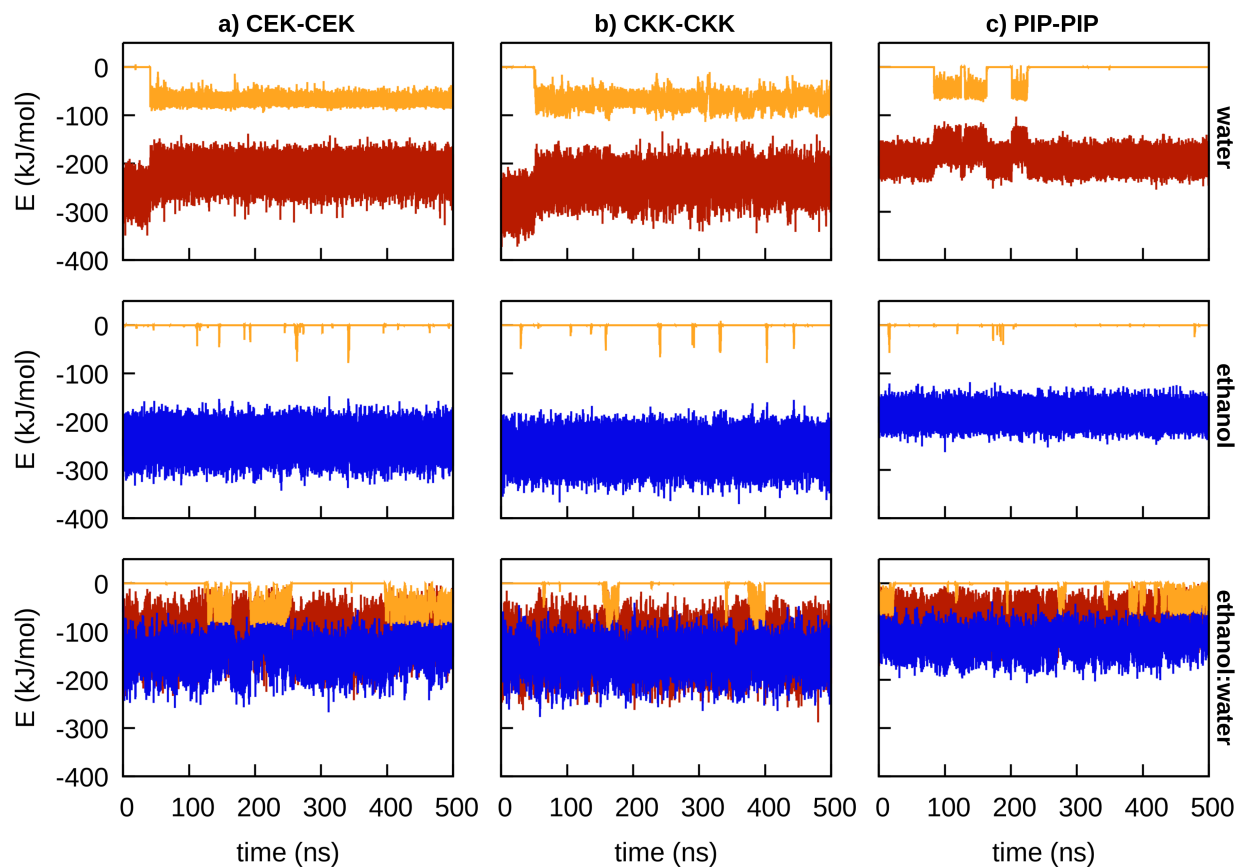

Figure S6: Solute-solute (yellow), solute-water (red), and solute-ethanol (blue) interaction energies as a function of time for simulations of distinct pairs of solute molecules in water (upper), ethanol (middle), and solvent mixture (bottom): a) CEK-CEK; b) CKK-CKK; c) PIP-PIP. Regarding the solute-solvent energy, for clearness, only the component corresponding to the interaction of one molecule of solute with the solvent is represented, since the component involving the other solute molecule with the solvent originates a similar plot.

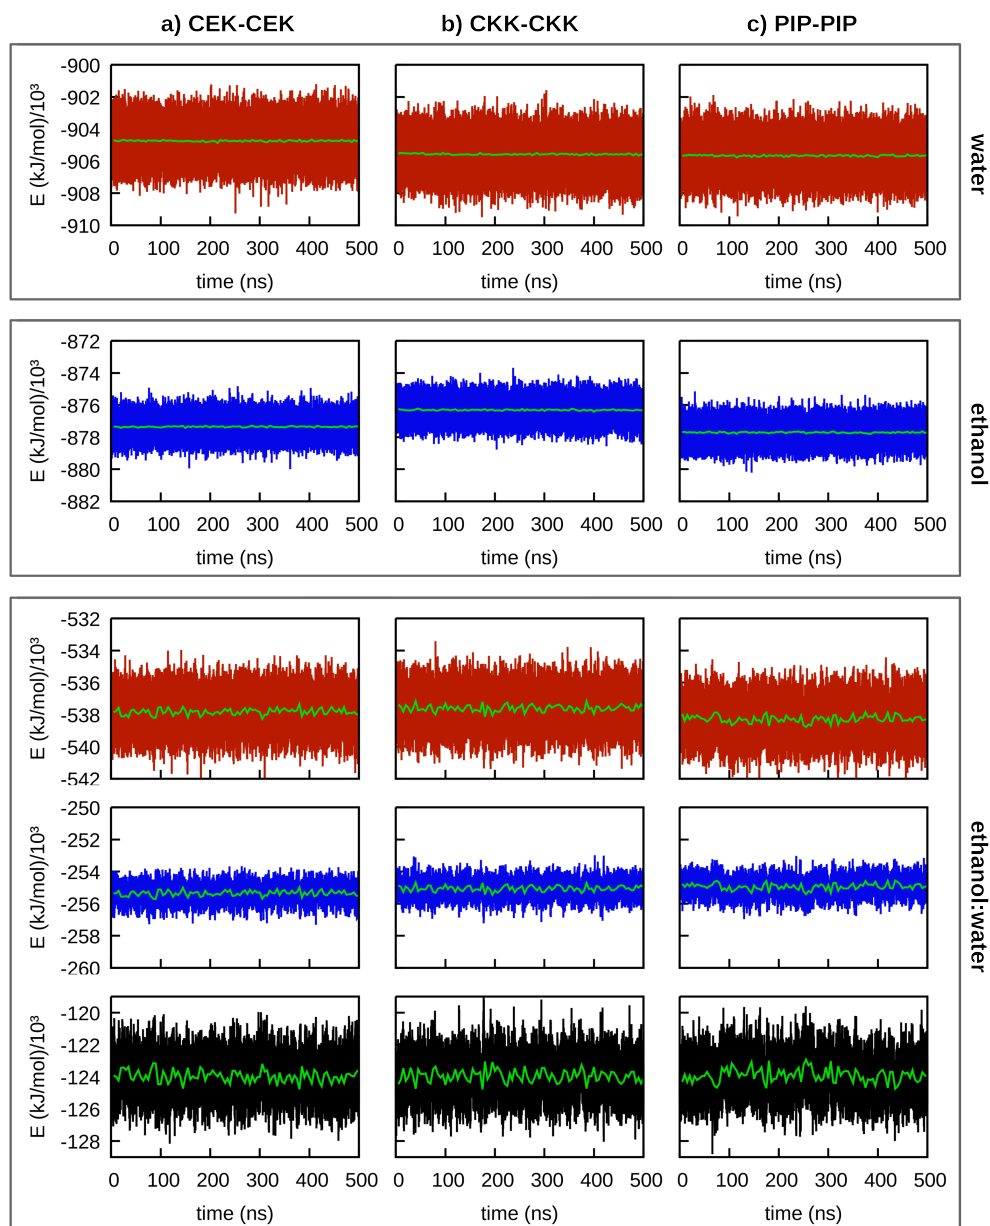

Figure S7: Water-water (red), ethanol-ethanol (blue), and water-ethanol (black) interaction energies as a function of time for simulations of distinct pairs of solute molecules in water (upper), ethanol (middle), and solvent mixture (bottom): a) CEK-CEK; b) CKK-CKK; c) PIP-PIP. The green lines represent an average energy value calculated for each 5 ns of time interval.

**Table S5: Average values of interaction energies obtained from the plots of Fig. S7.**

|                                                | CEK-CEK            | CKK-CKK            | PIP-PIP            |
|------------------------------------------------|--------------------|--------------------|--------------------|
| Pure Solvents Simulations                      |                    |                    |                    |
| $E_{water-water}/10^3 \text{ kJ mol}^{-1}$     | $-904.74 \pm 0.95$ | $-905.57 \pm 0.95$ | $-905.66 \pm 0.94$ |
| $E_{ethanol-ethanol}/10^3 \text{ kJ mol}^{-1}$ | $-877.35 \pm 0.58$ | $-876.31 \pm 0.59$ | $-877.71 \pm 0.58$ |
| Solvent Mixture (30:70) Simulations            |                    |                    |                    |
| $E_{water-water}/10^3 \text{ kJ mol}^{-1}$     | $-537.82 \pm 0.96$ | $-537.60 \pm 0.97$ | $-538.27 \pm 0.97$ |
| $E_{ethanol-ethanol}/10^3 \text{ kJ mol}^{-1}$ | $-255.35 \pm 0.48$ | $-255.05 \pm 0.47$ | $-254.94 \pm 0.48$ |
| $E_{ethanol-water}/10^3 \text{ kJ mol}^{-1}$   | $-123.95 \pm 1.08$ | $-123.94 \pm 1.06$ | $-123.91 \pm 1.08$ |

## Solute-solute and solute-solvent hydrogen bonds

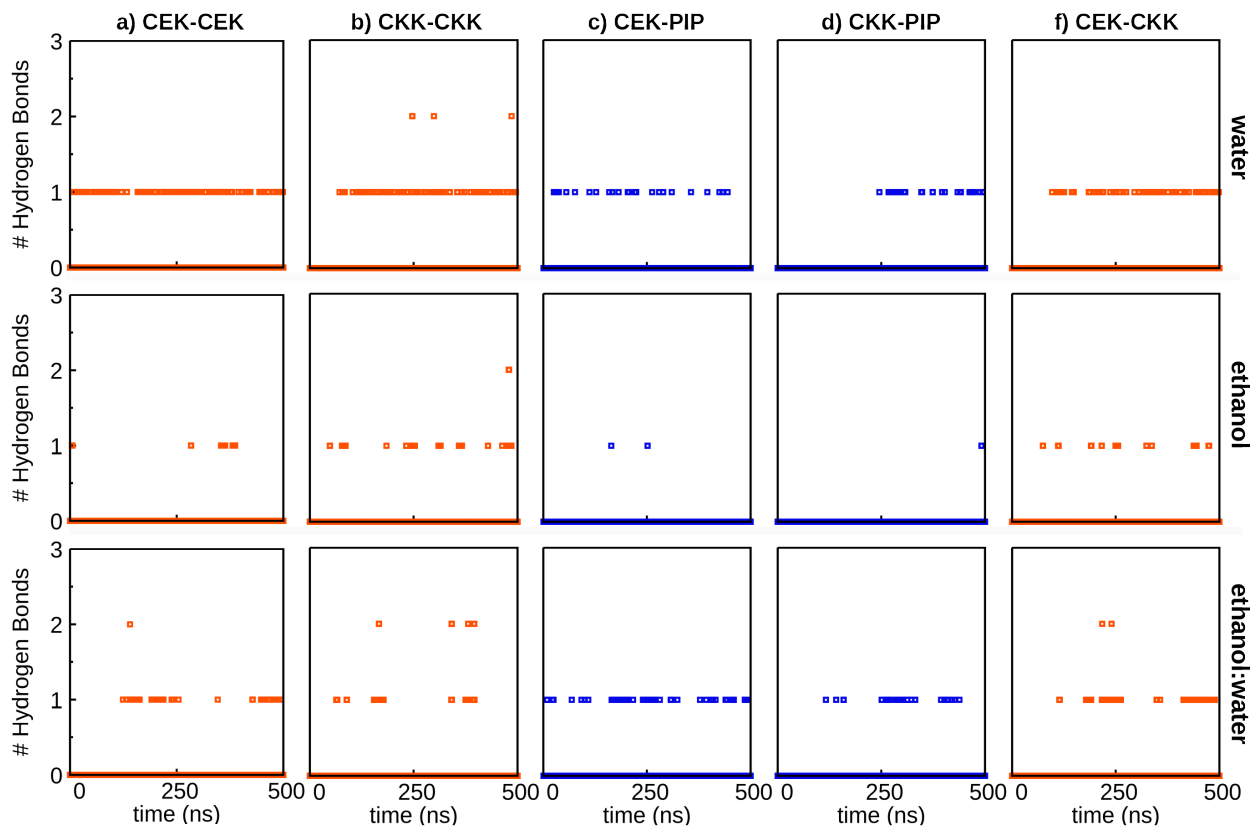

Figure S8: Solute-solute number of hydrogen bonds of six simulations of distinct pairs of solute molecules in water, (30:70) solvent mixture, and ethanol: a) CEK-CEK; b) CKK-CKK; c) CEK-PIP; d) CKK-PIP; f) CEK-CKK. For defining a hydrogen bond, we have employed the default angle and distance criterion implemented in GROMACS.

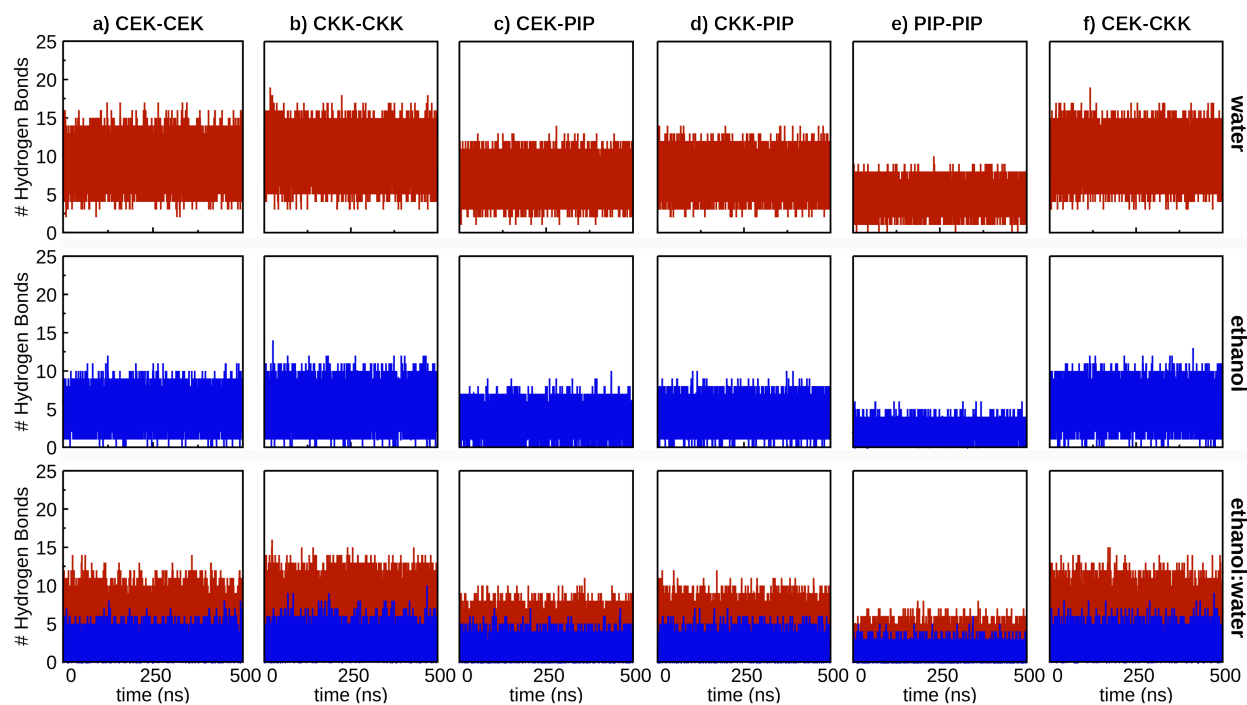

Figure S9: Solute-solute number of hydrogen bonds of six simulations of distinct pairs of solute molecules in water, eta:water or ethanol solution: a) CEK-CEK; b) CKK-CKK; c) CEK-PIP; d) CKK-PIP; e) PIP-PIP; f) CEK-CKK.; The number of hydrogen bonds is calculated between each solute and water (red) or ethanol (blue lines). For defining a hydrogen bond, we have employed the default angle and distance criterion implemented in GROMACS.

## Simulation of 2CEK+2CKK in ethanol

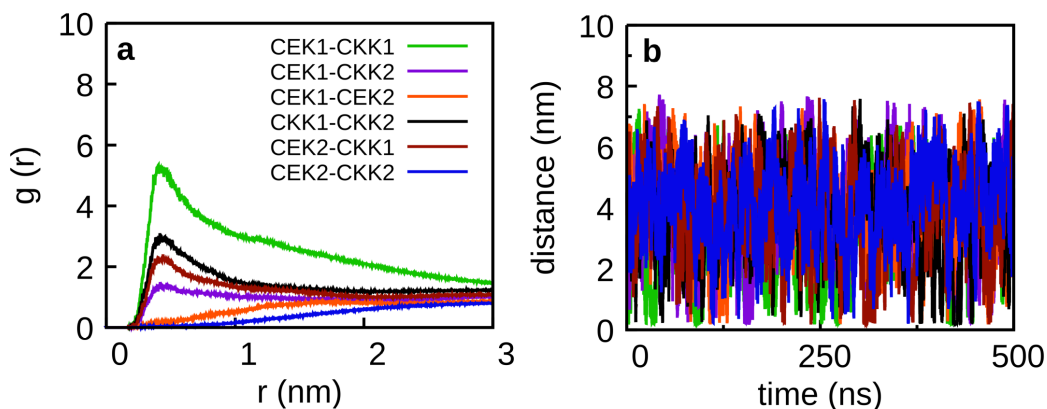

Figure S10: Simulation of 2CEK + 2CKK molecules in ethanol: a) RDFs for pairs of solute molecules; b) distance between pairs of solute molecules. Such molecules are labelled as CEK1, CEK2, CKK1 and CKK2. Key for colors inserted in panel a also applies for panel b.

## Additional plots from curcumin-piperine simulations

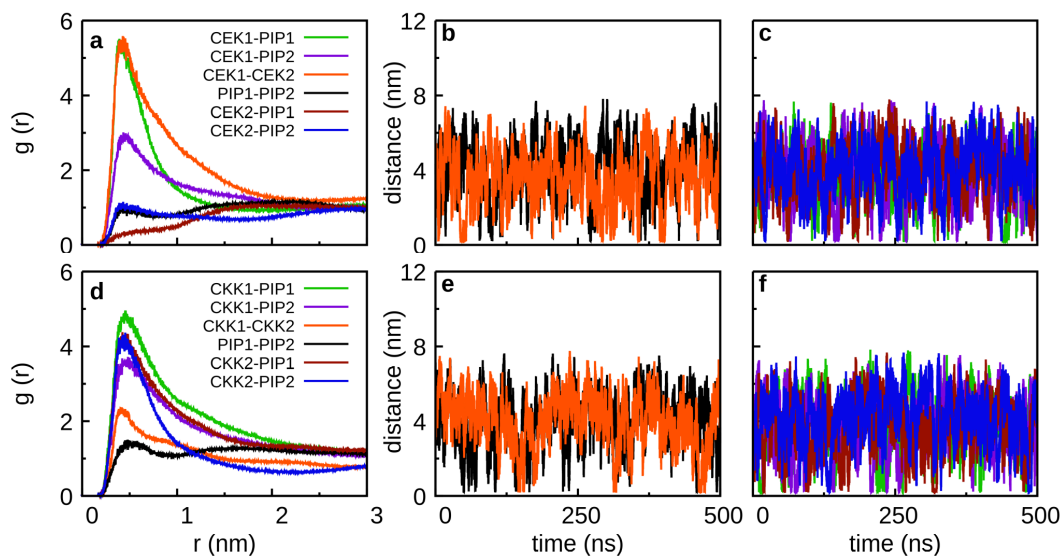

Figure S11: Simulation of 2CEK + 2PIP (panels a-c) and 2CKK + 2PIP (panels d-f) in ethanol: RDFs for pairs of solute molecules (panels a and d) and the corresponding inter-monomer distances (panels a, c, e, and f). Monomers are labelled as CEK1, CEK2, CKK1, CKK2, PIP1, and PIP2. Key for colors inserted in panel a (or d) also applies for panels b and c (or e and f).



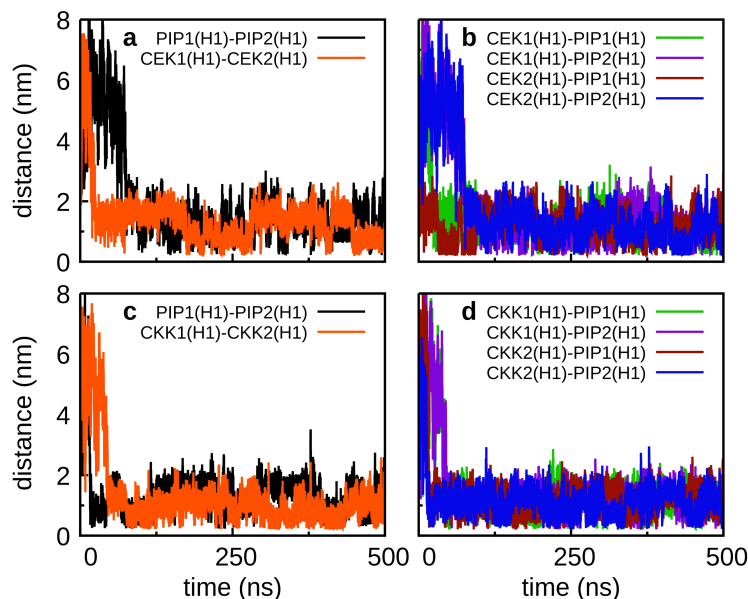

Figure S12: Simulations of 2CEK+2PIP (top panels) and 2CKK+2PIP (bottom panels) in water. Panels a and c (panels b and d) represent distances between H1 atoms of alike (distinct) monomers.

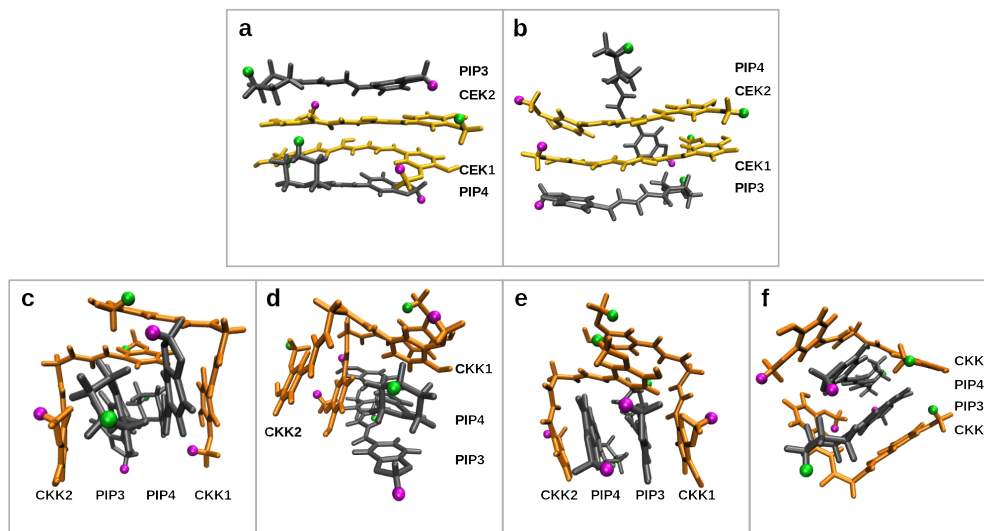

Figure S13: Most representative structures of 2CEK+2PIP (panels a and b) and 2CKK+2PIP (panels c-f) obtained by cluster analysis of the corresponding MD trajectories performed in water. The frequencies of appearance of the represented structures are: 19% (a), 10% (b), 34% (c), 7% (d), 7% (e), and 6% (f). RMSD cutoffs are (in nm): 0.25 (panels a and b), 0.20 (panels c-f). Key for colors: CEK (yellow), CKK (orange) and PIP (dark grey); H1 atoms are displayed in green, while the H15 (H18) ones of curcumin (piperine) are in magenta.

## References

- (1) Cunha, C.; Peixoto, M. S.; Santos, J. R.; Abreu, P. E.; Paixão, J. A.; Pineiro, M.; Seixas de Melo, J. S., Practical Design of 3,6-Di-tert-butylidiphenyldibenzofulvene Derivatives with Enhanced Aggregation-Induced Emission. *ACS Applied Optical Materials*, in press. DOI: 10.1021/acsaom.2c00067.
- (2) [https://www.engineeringtoolbox.com/ethanol-water-mixture-density-d\\_2162.html](https://www.engineeringtoolbox.com/ethanol-water-mixture-density-d_2162.html).
- (3) Martínez, L.; Andrade, R.; Birgin, E. G.; Martínez, J. M. PACKMOL: A package for building initial configurations for molecular dynamics simulations. *Journal of Computational Chemistry* **2009**, *30*, 2157–2164, \_eprint: <https://onlinelibrary.wiley.com/doi/pdf/10.1002/jcc.21224>.
- (4) Alvarez-Garcia, D.; Barril, X. Molecular Simulations with Solvent Competition Quantify Water Displaceability and Provide Accurate Interaction Maps of Protein Binding Sites. *Journal of Medicinal Chemistry* **2014**, *57*, 8530–8539, Publisher: American Chemical Society.
- (5) <http://www.ub.edu/cbdd/?q=content/organic-solvent-boxes>.
